# Supplementary material
Source: Springer Nature journal article supplement (https://www.springermedizin.de/resource/supplementary/12936_2012_2118_MOESM1_ESM.pdf/9542620)
Supplement: MOESM1 [file 9542620]

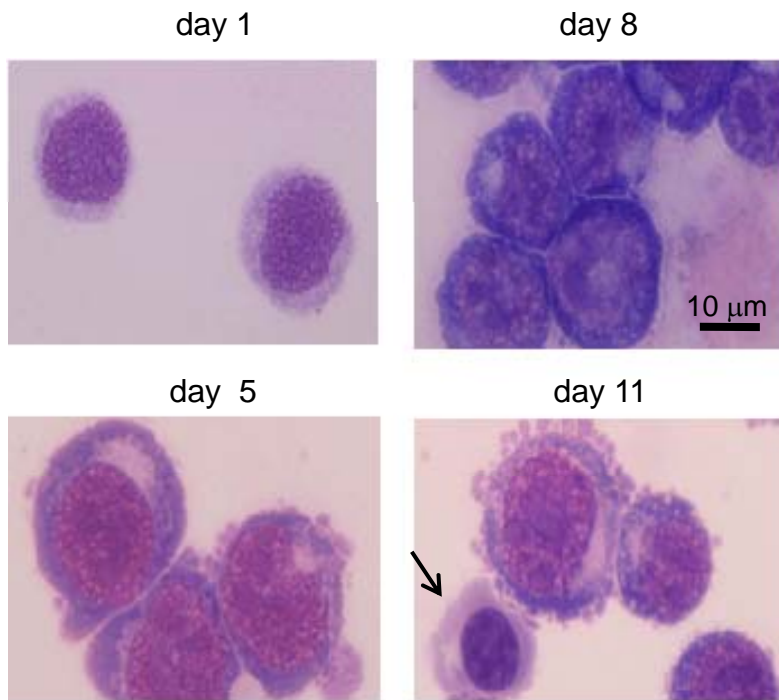

**Additional file 1 Erythroid cell development.** Giemsa staining of cells from 1-11 day-old cultures showing CD34<sup>+</sup> cells on day 1, and morphological characteristic of erythroid cells with hemoglobin and chromatin condensation for an orthochromic normoblasts (arrow) on day 11. Magnification X 1,000.
